# Supplementary material for: Inter- and intramolecular aldol reactions promiscuously catalyzed by a proline-based tautomerase
Source: Royal Society of Chemistry journal article supplement (doi:10.1039/c7ob00302a), 2017-01-01
Supplement: c7ob00302a1.pdf [file c7ob00302a1.pdf]

## Supporting Information

### Materials

The sources for the buffers, solvents, and components of Luria-Bertani (LB) media are reported elsewhere.<sup>1</sup> High purity synthetic 4-OT was purchased from GenScript USA Inc. (Piscataway, NJ) and folded into the active homohexamer as described before.<sup>2</sup> Chemicals were obtained from Sigma-Aldrich Chemical Co. (St. Louis, MO). Compound **4** was synthesized from **3** according to a literature procedure.<sup>3</sup> Compounds **11** and **14** were synthesized from *trans*-cyclohexane-1,2-diol and *trans*-cycloheptane-1,2-diol according to a modified literature procedure (Scheme S6).<sup>4</sup>

### General methods

Standard molecular biology techniques were performed based on methods described elsewhere.<sup>5</sup> Protein analysis was performed by polyacrylamide gel electrophoresis (PAGE) using sodium dodecyl sulfate (SDS) gels containing polyacrylamide (10%). Coomassie brilliant blue was used to stain the gels. Protein concentrations were determined based on the Waddell method.<sup>6</sup> Enzymatic assays were performed on a V-650 or V-660 spectrophotometer from Jasco (IJsselstein, The Netherlands). <sup>1</sup>H NMR spectra were recorded on a Varian Inova 500 (500 MHz) spectrometer using a pulse sequence for selective presaturation of the water signal. Chemical shifts for protons are reported in parts per million scale and are referenced to H<sub>2</sub>O (4.80 ppm).

### Expression and purification of WT 4-OT, 4-OT F50A and 4-OT P1A

The WT 4-OT, 4-OT F50A and 4-OT P1A enzymes were produced in *E. coli* BL21 (DE3) as native proteins (without His-tag) using the pET20b(+) expression system as described before.<sup>7</sup> The construction of the expression vectors and the purification procedure for 4-OT and the mutant enzymes were reported previously.<sup>7</sup> Before applying the 4-OT P1A mutant, which has essentially no aldolase activity, we first

confirmed that purified 4-OT P1A was catalytically active by measuring its promiscuous oxaloacetate decarboxylase activity.<sup>8</sup>

### **UV spectroscopic assay for self-condensation of propanal (3)**

The self-condensation of propanal (**3**) was monitored by following the increase in absorbance at 234 nm which corresponds to the formation of 2-methyl-2-pentenal (**5**). The enzyme (150  $\mu$ M) was incubated in a 1 mm cuvette with **3** (50 mM) in 20 mM  $\text{NaH}_2\text{PO}_4$  buffer (pH 7.3; 0.3 mL final volume) and the reaction was followed for 20 h at room temperature. UV spectra were recorded from 200 to 400 nm.

### **UV spectroscopic assay for dehydration of 3-hydroxy-2-methylpentanal (4)**

The dehydration of 3-hydroxy-2-methylpentanal (**4**) was monitored by following the increase in absorbance at 234 nm which corresponds to the formation of 2-methyl-2-pentenal (**5**) (Figure S1). The enzyme (150  $\mu$ M) was incubated in a 1 mm cuvette with **4** (20 mM) in 20 mM  $\text{NaH}_2\text{PO}_4$  buffer (pH 7.3; 0.3 mL final volume) and the reaction was followed for 5 h at room temperature. UV spectra were recorded from 200 to 400 nm.

### **Preparation of $\text{NaD}_2\text{PO}_4$ buffer**

$\text{NaH}_2\text{PO}_4$  buffer (20 mL, 20 mM; pH 7.3) was lyophilized. Subsequently, the residue was dissolved in  $\text{D}_2\text{O}$  (2 mL), and stirred for 60 min. This solution was again lyophilized, dissolved in  $\text{D}_2\text{O}$  (2 mL), and stirred for 60 min. The resulting mixture was lyophilized once more, after which the residue was dissolved in  $\text{D}_2\text{O}$  (20 mL) yielding a stock solution of  $\text{NaD}_2\text{PO}_4$  (20 mM; pD 7.6).

### **Redissolving 4-OT in $\text{NaD}_2\text{PO}_4$ buffer**

A Vivaspin 2 concentrator (from Sartorius Stedim Goettingen, Germany) with a cut-off filter of 5000 Da was washed four times with  $\text{H}_2\text{O}$  by centrifugation (4000 rpm, 20 min). Subsequently, the concentrator was charged with a solution of 4-OT (either wild-type or mutant; 300  $\mu$ L with concentration of  $\sim$ 10 mg/mL in 20 mM  $\text{NaH}_2\text{PO}_4$  buffer, pH 7.3) and centrifuged (4000 rpm, 30 min). The enzyme was

retained on the filter and redissolved in  $\text{NaD}_2\text{PO}_4$  (200  $\mu\text{L}$ , 20 mM; pD 7.6) and centrifuged (4000 rpm, 30 min). Once more, the remaining enzyme on the filter was redissolved in  $\text{NaD}_2\text{PO}_4$  (300  $\mu\text{L}$ , 20 mM; pD 7.6), after which the final enzyme concentration was determined.

### **$^1\text{H}$ NMR spectroscopic assay for self-condensation of propanal (**3**)**

In separate experiments, WT 4-OT, 4-OT F50A and 4-OT P1A (290  $\mu\text{M}$ ) were incubated with **3** (30 mM) and 18-crown-6 ether (internal standard; 2.15 mM) at room temperature in  $\text{NaD}_2\text{PO}_4$  buffer (20 mM; pD 7.6, final volume of 650  $\mu\text{L}$  in an NMR tube). A control sample was prepared containing all components except for the enzyme.  $^1\text{H}$  NMR spectra were recorded ~1 h after the start of the incubation, and subsequently after 1, 4, 8 and 14 d.  $^1\text{H}$  NMR spectroscopic data (in 20 mM  $\text{NaD}_2\text{PO}_4$  buffer, pD 7.6) of enzymatically obtained **5** are similar to those of an authentic standard of **5**. The hydrated form of **5** was not observed.

### **Internal standard 18-crown-6 (1,4,7,10,13,16-hexaoxacyclooctadecane)**

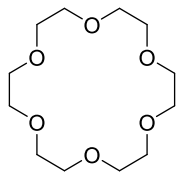

$^1\text{H}$  NMR (500 MHz, 20 mM  $\text{NaD}_2\text{PO}_4$ ; pD 7.6):  $\delta$  3.68 (s, 24H)

### **Propanal (**3**)**

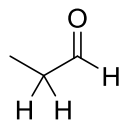

$^1\text{H}$  NMR (500 MHz, 20 mM  $\text{NaD}_2\text{PO}_4$ ; pD 7.6):  $\delta$  9.69 (t,  $J$  = 1.3 Hz, 1H), 2.57 (dq,  $J$  = 7.3, 1.3 Hz, 2H), 1.06 (t,  $J$  = 7.3 Hz, 3H)

**Propanal-2,2- $d_2$  (3- $d_2$ )**

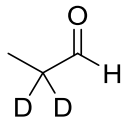

$^1\text{H}$  NMR (500 MHz, 20 mM  $\text{NaD}_2\text{PO}_4$ ; pD 7.6):  $\delta$  9.69 (s, 1H), 1.03 (s, 3H)

**Propane-1,1-diol- $d_2$  (3', hydrate of 3)**

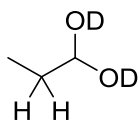

$^1\text{H}$  NMR (500 MHz, 20 mM  $\text{NaD}_2\text{PO}_4$ ; pD 7.6):  $\delta$  4.96 (t,  $J = 5.5$  Hz, 1H), 1.59 (dq,  $J = 7.5, 5.5$  Hz, 2H),  
0.92 (t,  $J = 7.5$  Hz, 3H)

**Propane-2,2- $d_2$ -1,1-diol- $d_2$  (3'- $d_2$ )**

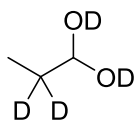

$^1\text{H}$  NMR (500 MHz, 20 mM  $\text{NaD}_2\text{PO}_4$ ; pD 7.6):  $\delta$  4.95 (s, 1H), 0.88 (s, 3H)

**2-Methyl-2-pentenal (5)**

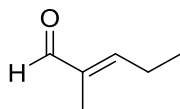

$^1\text{H}$  NMR (500 MHz, 20 mM  $\text{NaD}_2\text{PO}_4$ ; pD 7.6):  $\delta$  9.29 (s, 1H), 6.81 (t,  $J = 7.6$  Hz, 1H), 2.41 (dq,  $J = 7.6, 7.6$  Hz, 2H), 1.71 (s, 3H), 1.09 (t,  $J = 7.6$  Hz, 3H)

### UV spectroscopic assay for cross-coupling of propanal (**3**) and benzaldehyde (**6**)

The cross-coupling of **3** and **6** was monitored by following the decrease in absorbance at 250 nm ( $\lambda_{\text{max},6} = 250 \text{ nm}$ ) indicating depletion of **6** (Figure S2). Simultaneously, the increase in absorbance at 288 nm, corresponding to the formation of **8** ( $\lambda_{\text{max},8} = 288 \text{ nm}$ ), was monitored. The enzyme (150  $\mu\text{M}$ ) was incubated in a 1 mm cuvette with **3** (50 mM) and **6** (2 mM) in 20 mM  $\text{NaH}_2\text{PO}_4$  buffer (pH 7.3; 0.3 mL final volume) and the reaction was followed for 20 h at room temperature. UV spectra were recorded from 200 to 400 nm.

### $^1\text{H}$ NMR spectroscopic assay for cross-coupling of propanal (**3**) and benzaldehyde (**6**)

In separate experiments, the enzymes WT 4-OT, 4-OT F50A and 4-OT P1A (290  $\mu\text{M}$ ) were incubated with **3** (30 mM), **6** (15 mM) and 18-crown-6 ether (internal standard; 2.15 mM) at room temperature in  $\text{NaD}_2\text{PO}_4$  buffer (20 mM; pD 7.6, final volume of 650  $\mu\text{L}$  in an NMR tube) (Figure S3). A control sample was prepared with all the components except for the enzyme.  $^1\text{H}$  NMR spectra were recorded  $\sim 2$  h after incubation, and then after 1, 4, 8 and 14 d.  $^1\text{H}$  NMR spectroscopic data of **7**<sup>9,10</sup> are in accordance with data in the literature.  $^1\text{H}$  NMR spectroscopic data (in 20 mM  $\text{NaD}_2\text{PO}_4$  buffer, pD 7.6) of enzymatically prepared **8** are identical to those of an authentic standard of **8**. Hydrated forms of **6** and **8** were not observed.

### Benzaldehyde (**6**)

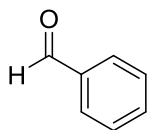

$^1\text{H}$  NMR (500 MHz, 20 mM  $\text{NaD}_2\text{PO}_4$ ; pD 7.6):  $\delta$  9.94 (s, 1H), 7.97 (d,  $J = 7.9 \text{ Hz}$ , 2H), 7.76 (d,  $J = 7.5 \text{ Hz}$ , 1H), 7.63 (dd,  $J = 7.9, 7.5 \text{ Hz}$ , 2H)

**3-(Hydroxy-*d*)-2-methyl-3-phenylpropanal-2-*d* (7)**

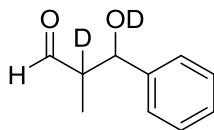

$^1\text{H}$  NMR (500 MHz, 20 mM  $\text{NaD}_2\text{PO}_4$ ; pD 7.6):  $\delta$  9.74 (s, 1H), 7.48 – 7.36 (m, 5H), 5.23 (s, 1H), 1.03 (s, 3H)

**2-Methyl-3-phenylpropane-2-*d*-1,1,3-triol-*d*<sub>3</sub> (7')**

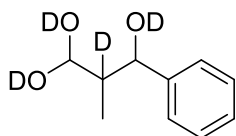

$^1\text{H}$  NMR (500 MHz, 20 mM  $\text{NaD}_2\text{PO}_4$ ; pD 7.6):  $\delta$  7.48 – 7.36 (m, 5H), 5.21 (s, 1H), 4.94 (s, 1H), 0.94 (s, 3H)

**(*E*)-2-Methyl-3-phenylacrylaldehyde (8)**

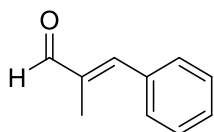

$^1\text{H}$  NMR (500 MHz, 20 mM  $\text{NaD}_2\text{PO}_4$ ; pD 7.6):  $\delta$  9.49 (s, 1H), 7.67 (d,  $J$  = 7.5 Hz, 2H), 7.55 – 7.50 (m, 4H), 2.03 (s, 3H)

**$^1\text{H}$  NMR spectroscopic assay for cross-coupling of propanal (3) and pyruvate (9)**

In separate experiments, the enzymes WT 4-OT, 4-OT F50A and 4-OT P1A (290  $\mu\text{M}$ ) were incubated with **3** (30 mM) and **9** (15 mM) and 18-crown-6 ether (internal standard; 2.15 mM) at room temperature in  $\text{NaD}_2\text{PO}_4$  buffer (20 mM; pD 7.6, final volume of 650  $\mu\text{L}$  in an NMR tube) (Figure S5). The control

sample was prepared with all the components except for the enzyme.  $^1\text{H}$  NMR spectra were recorded ~1 h after incubation, and then after 1, 4, 8 and 14 d. The yield of product **10** was determined on the basis of the sum of the integrations of the two aldehyde signals of the two diastereoisomers of **10**. All other proton signals of **10** were either invisible as a result of H-D exchange or overlap with signals of starting materials **3** and **9**. To the best of our knowledge, synthesis of 2-hydroxy-2,3-dimethyl-4-oxobutanoic acid (**10**) has not been reported in the literature so far. Therefore, we have chemically synthesized **10** to confirm the identity of enzymatically obtained **10**, and for full characterization with  $^1\text{H}$  NMR,  $^{13}\text{C}$  NMR, and exact mass spectroscopy (vide infra).

The experiment with WT 4-OT was repeated in  $\text{NaH}_2\text{PO}_4$  buffer (20 mM; pH 7.3) with  $\text{D}_2\text{O}$  (10% v/v) to avoid H-D exchange and enable the detection of all proton signals of **10** by  $^1\text{H}$  NMR spectroscopy (Figures S5 and S7). Propanal (**3**, 50 mM) and pyruvate (**9**, 50 mM) were incubated with WT 4-OT (90  $\mu\text{M}$ ) in  $\text{NaH}_2\text{PO}_4$  buffer (20 mM; pH 7.6, final volume of 650  $\mu\text{L}$  in an NMR tube). Reaction progress was monitored with  $^1\text{H}$  NMR spectroscopy which revealed formation of product **10**, as a result of cross-coupling of **3** and **9**, and of product **5** as a result of self-coupling of **3**. In contrast to the experiment in 100%  $\text{NaD}_2\text{PO}_4$  buffer (vide supra, Figure S5), the hydrated form of **10** (i.e. **10'**) was observed in small quantities (<5% compared to **10**). This experiment was repeated in the absence of enzyme and in the presence of synthetic 4-OT WT<sup>2</sup> instead of recombinant 4-OT. In the absence of enzyme, formation of product **10** was not observed while only trace amounts of **5** were detected. In the presence of synthetic 4-OT WT, formation of products **10** and **5** was observed in equal quantities as in the presence of recombinant 4-OT WT.

### Pyruvate (**9**)

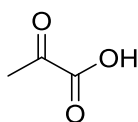

$^1\text{H}$  NMR (500 MHz, 20 mM  $\text{NaH}_2\text{PO}_4$ ; pH 7.3):  $\delta$  2.39 (s, 3H)

**2,2-Dihydroxypropanoic acid (9': hydrated 9)**

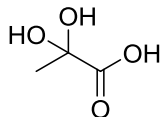

$^1\text{H}$  NMR (500 MHz, 20 mM  $\text{NaH}_2\text{PO}_4$ ; pH 7.3):  $\delta$  1.50 (s, 3H)

**2-Hydroxy-2,3-dimethyl-4-oxobutanoic acid (10, enzymatically prepared)**

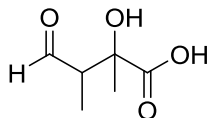

$^1\text{H}$  NMR (500 MHz, 20 mM  $\text{NaH}_2\text{PO}_4$ ; pH 7.3): (diastereomer I)  $\delta$  9.74 (d,  $J$  = 2.7 Hz, 1H), 2.74 (dq,  $J$  = 7.0, 2.7 Hz, 1H), 1.44 (s, 3H), 1.08 (d,  $J$  = 7.0 Hz, 3H); (diastereomer II)  $\delta$  9.62 (d,  $J$  = 0.9 Hz, 1H), 2.74 (dq,  $J$  = 7.0, 0.9 Hz, 1H), 1.47 (s, 3H), 1.02 (d,  $J$  = 7.0 Hz, 3H)

**2,4,4-Trihydroxy-2,3-dimethylbutanoic acid (10')**

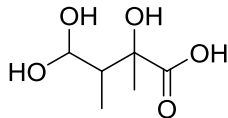

The  $^1\text{H}$  NMR spectroscopic data for **10'** are listed below (see chemically prepared **10**).

**Chemical synthesis of 2-hydroxy-2,3-dimethyl-4-oxobutanoic acid (10)**

Compound **10** was synthesized by a two-step procedure. During the first step, an aldol coupling of propanal (**3**) and ethyl 2-oxopropanoate (commercially available), following a modified literature procedure,<sup>11</sup> gave ethyl 2-hydroxy-2,3-dimethyl-4-oxobutanoate in 67% yield after column



chromatography. Subsequently, ethyl 2-hydroxy-2,3-dimethyl-4-oxobutanoate was hydrolyzed with LiOH in D<sub>2</sub>O to give 2-hydroxy-2,3-dimethyl-4-oxobutanoic acid (**10**). The <sup>1</sup>H NMR data of enzymatically obtained **10** matched those of chemically obtained **10** (Figure S7).

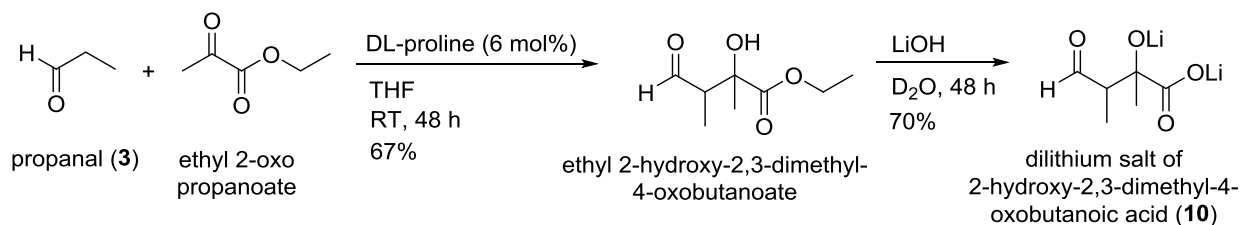

**Scheme S1.** Chemical synthesis of **10**.

#### Ethyl 2-hydroxy-2,3-dimethyl-4-oxobutanoate.

Ethyl 2-oxopropanoate (2.0 g, 17.2 mmol) and propanal (**3**, 4.0 g, 68.9 mmol) were dissolved in THF (25 mL). DL-proline (115 mg, 1.0 mmol) was added and the mixture was stirred for 48 h at room temperature. Reaction progress was monitored by thin layer chromatography (silica gel, hexanes/ethyl acetate 3/1). The solvent was evaporated *in vacuo* and the residue was submitted to column chromatography (silica gel, hexanes/ethyl acetate 5/1) to yield two diastereoisomers of ethyl 2-hydroxy-2,3-dimethyl-4-oxobutanoate (2.0 g, 11.5 mmol, 67%) in a ~55/45 ratio as a colorless oil. <sup>1</sup>H NMR (500 MHz, CDCl<sub>3</sub>, 20°C); major diastereomer: δ 9.63 (s, 1H), 4.31 – 4.20 (m, 2H), 3.25 (b, 1H), 2.62 (q, *J* = 7.3 Hz, 1H), 1.43 (s, 3H), 1.28 (t, *J* = 7.2 Hz, 3H), 1.23 (d, *J* = 7.3 Hz, 3H); minor diastereomer: δ 9.74 (d, *J* = 2.9 Hz, 1H), 4.31 – 4.20 (m, 2H), 3.25 (b, 1H), 2.62 (dq, *J* = 7.1, 2.9 Hz, 1H), 1.50 (s, 3H), 1.30 (t, *J* = 7.1 Hz, 3H), 1.10 (d, *J* = 7.1 Hz, 3H); <sup>13</sup>C NMR (125 MHz, CDCl<sub>3</sub>, 20°C); major diastereomer: δ 202.72, 175.86, 74.15, 62.14, 53.13, 24.08, 13.96, 7.96; minor diastereomer: δ 203.16, 175.16, 75.03, 62.30, 52.81, 24.53, 14.00, 9.51; HRMS (ESI): *m/z* = 175.09665 [M+H]<sup>+</sup> (calcd. 175.09650 for C<sub>8</sub>H<sub>15</sub>O<sub>4</sub>).

**2-Hydroxy-2,3-dimethyl-4-oxobutanoic acid (10).** A mixture of ethyl 2-hydroxy-2,3-dimethyl-4-oxobutanoate (112 mg, 0.64 mmol), LiOH (15.3 mg, 0.64 mmol) and D<sub>2</sub>O (1.5 mL) was stirred for 2 d at room temperature. A <sup>1</sup>H NMR spectrum of an aliquot of the reaction mixture, diluted with D<sub>2</sub>O, revealed ~70% conversion of ethyl 2-hydroxy-2,3-dimethyl-4-oxobutanoate into 2-hydroxy-2,3-dimethyl-4-oxobutanoic acid (**10**). The reaction mixture was washed with EtOAc (7 × 1.5 mL) to remove unhydrolyzed ester and ethanol. The D<sub>2</sub>O layer was concentrated to ~1.0 mL *in vacuo* to remove residual EtOAc. The remaining D<sub>2</sub>O layer was analyzed by <sup>1</sup>H NMR spectroscopy revealing the presence of two diastereomers of 2-hydroxy-2,3-dimethyl-4-oxobutanoic acid (**10**) in a ~1/1 ratio. The hydrated forms of both diastereomers (i.e. 2,4,4-trihydroxy-2,3-dimethylbutanoic acid **10'**) were also observed (~7 mol% relative to aldehyde **10**). <sup>1</sup>H NMR (500 MHz, D<sub>2</sub>O, 20°C): (diastereomer I) δ 9.80 (d, *J* = 2.2 Hz, 1H), 2.78 (dq, *J* = 7.0, 2.2 Hz, 1H), 1.48 (s, 3H), 1.12 (d, *J* = 7.0 Hz, 3H); (diastereomer II) δ 9.67 (s, 1H), 2.78 (q, *J* = 7.0, 1H), 1.51 (s, 3H), 1.06 (d, *J* = 7.0 Hz, 3H); diastereomers of hydrate: δ 5.30 (d, *J* = 4.0 Hz, 1H) and 5.13 (d, *J* = 3.4 Hz, 1H), 2.12 – 2.08 (m, 1H) and 2.07 – 2.03 (m, 1H), 1.42 (s, 3H) and 1.34 (s, 3H), 1.02 (d, *J* = 7.1 Hz, 3H) and 0.94 (d, *J* = 7.1 Hz, 3H); <sup>13</sup>C NMR (125 MHz, D<sub>2</sub>O, 20°C): (two diastereomers) δ 207.49 and 207.46, 181.22 and 180.76, 76.88 and 76.53, 53.78 and 52.78, 24.21 and 23.68, 8.72 and 7.47; HRMS (ESI): *m/z* = 159.08167 [M+H]<sup>+</sup> (calcd. 159.08154 for C<sub>6</sub>H<sub>9</sub>O<sub>4</sub>Li<sub>2</sub>).

#### **<sup>1</sup>H NMR spectroscopic assay for retro-aldol activity (conversion of **10** into **3** and **9**)**

In separate experiments, the enzymes WT 4-OT and 4-OT F50A (1 mg/mL, 150 μM in 20 mM NaH<sub>2</sub>PO<sub>4</sub>, pH 7.3) were incubated with **10** (300 μL from a 150 mM stock solution in D<sub>2</sub>O, pH 4.5; final concentration of 30 mM), and the total volume was set at 1.5 mL using 20 mM NaH<sub>2</sub>PO<sub>4</sub>, pH 7.3 (Figure S8). The reactions were performed in NaH<sub>2</sub>PO<sub>4</sub>, instead of NaD<sub>2</sub>PO<sub>4</sub>, to avoid H-D exchange of acidic protons of **9** and to be able to observe the <sup>1</sup>H NMR signal corresponding to **9**. A control experiment without enzyme but under otherwise identical conditions was performed as well. To record <sup>1</sup>H NMR spectra, 500 μL of each reaction mixture was diluted with 70 μL of 20 mM NaH<sub>2</sub>PO<sub>4</sub> and 80 μL D<sub>2</sub>O

(final volume 650  $\mu$ L), and the spectra were recorded immediately after mixing. The first  $^1\text{H}$  NMR spectrum was recorded after 2 h, and then after 1 and 3 days.

#### **Chemical synthesis of hexanedial (**11**) and heptanedial (**14**)**

Dials **11** and **14** were synthesized *in situ* from *trans*-cyclohexane-1,2-diol (**17**) and *trans*-cycloheptane-1,2-diol (**18**) according to a modified literature procedure (Scheme S6).<sup>4</sup> General procedure: a 100 mM solution of diol and a 100 mM solution of sodium periodate were prepared in  $\text{D}_2\text{O}$ . Both solutions (500  $\mu$ L each) were transferred to a glass vial and the solution was mixed gently. After 1 h, a  $^1\text{H}$  NMR spectrum was recorded which showed quantitative conversion into the dial, which was in equilibrium with its mono- and dihydrates (**11'**, **11''**, **14'**, and **14''**), without any visible impurities.  $^1\text{H}$  NMR data of **11**<sup>[4]</sup> and **14**<sup>[12]</sup> are in accordance with data reported in the literature.

#### **UV spectroscopic assay for cyclization of **11** and **14****

In separate experiments, the enzymes WT 4-OT, 4-OT F50A and 4-OT P1A (150  $\mu$ M) were incubated with dial (**11** or **14**, 16.7 mM) in a 1 mm cuvette at room temperature in  $\text{NaH}_2\text{PO}_4$  buffer (20 mM, pH 7.3; 0.3 mL final volume) (Figures S9 and S13). UV spectra were recorded from 200 to 400 nm at  $t = 6$  and 12 h ( $\lambda_{\text{max},13} = 245$  nm (Lit : 236 nm in 99.5% EtOH)<sup>13</sup>,  $\lambda_{\text{max},16} = 236$  nm (Lit: 230 nm in 100% EtOH)<sup>14</sup>). Control experiments (all components but without enzyme) were performed as well.

#### **$^1\text{H}$ NMR spectroscopic assay for cyclization of **11** and **14****

The enzymes WT 4-OT and 4-OT F50A (148  $\mu$ M) were incubated separately with dialdehyde (**11** or **14**, 15.4 mM in 20 mM  $\text{NaD}_2\text{PO}_4$ , pD = 7.6) (Figures S10 and S14). Total volume of each reaction mixture was 650  $\mu$ L in an NMR tube. The tubes were stored at room temperature, protected from light.  $^1\text{H}$  NMR spectra were recorded after 0, 2, 21, 27, 45, 50, 68, 75, 144, 216, 242, 333, 408, 503, 528 and 672 h. After 4 weeks, the enzymes were still fully active as determined by an enzymatic assay monitoring the enol-

keto tautomerization of phenylpyruvate<sup>15</sup> (5 mM phenylpyruvate, 1  $\mu\text{g/mL}$  WT 4-OT or 0.1  $\mu\text{g/mL}$  4-OT F50A in  $\text{NaH}_2\text{PO}_4$  buffer, pH 7.3).  $^1\text{H}$  NMR spectroscopic data of **13**<sup>16</sup> and **16**<sup>17</sup> are consistent with data in the literature. Hydrated forms of **13** and **16** were not observed.

### Hexanedial (**11**)

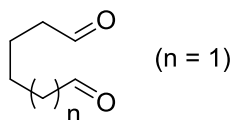

$^1\text{H}$  NMR (500 MHz, 20 mM  $\text{NaD}_2\text{PO}_4$ ; pD 7.6):  $\delta$  9.71 (t,  $J = 2.1$  Hz, 2H), 2.62 – 2.56 (m, 4H), 1.72 – 1.61 (m, 4H)

### 6,6-Di(hydroxy-*d*)hexanal (**11'**)

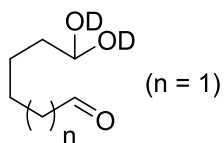

$^1\text{H}$  NMR (500 MHz, 20 mM  $\text{NaD}_2\text{PO}_4$ ; pD 7.6):  $\delta$  9.71 (t,  $J = 2.1$  Hz, 1H), 5.06 (t,  $J = 5.6$  Hz, 1H), 2.62 – 2.56 (m, 2H), 1.72 – 1.61 (m, 4H), 1.47 – 1.38 (m, 2H)

### Hexane-1,1,6,6-tetraol-*d*<sub>4</sub> (**11''**)

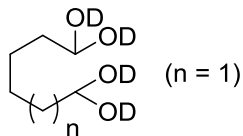

$^1\text{H}$  NMR (500 MHz, 20 mM  $\text{NaD}_2\text{PO}_4$ ; pD 7.6):  $\delta$  5.06 (t,  $J = 5.6$  Hz, 2H), 1.72 – 1.61 (m, 4H), 1.47 – 1.38 (m, 4H)

### 2-(Hydroxy-*d*)cyclopentane-1-carbaldehyde (**12**)

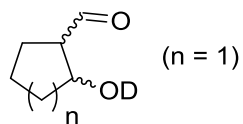

$^1\text{H}$  NMR (500 MHz, 20 mM  $\text{NaD}_2\text{PO}_4$ ; pD 7.6): (major diastereomer)  $\delta$  9.67 (s, 1H), 4.30 (m, 1H), 4.14 (m, 1H, overlapping with signal of compound **12'** (hydrate)), 1.96 – 1.46 (m, 6H); characteristic signal of minor diastereomer:  $\delta$  9.81 (s, 1H)

### (2-(Hydroxy-*d*)cyclopentyl)methanediol- $d_2$ (**12'**)

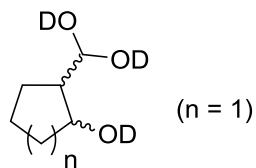

$^1\text{H}$  NMR (500 MHz, 20 mM  $\text{NaD}_2\text{PO}_4$ ; pD 7.6): (major diastereomer)  $\delta$  4.97 (s, 1H), 4.52 (m, 1H), 4.14 (m, 1H, overlapping with signal of compound **12**), 1.96 – 1.46 (m, 6H); characteristic signal of minor diastereomer:  $\delta$  5.03 (s, 1H)

### Cyclopent-1-ene-1-carbaldehyde (**13**)

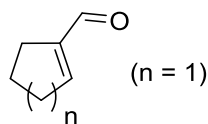

$^1\text{H}$  NMR (500 MHz, 20 mM  $\text{NaD}_2\text{PO}_4$ ; pD 7.6):  $\delta$  9.68 (s, 1H), 7.25 (s, 1H), 2.66 (t,  $J$  = 7.6 Hz, 2H), 2.49 (t,  $J$  = 7.0 Hz, 2H), 2.05 – 1.99 (m, 2H)

### Heptanedial (**14**)

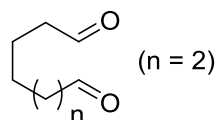

$^1\text{H}$  NMR (500 MHz, 20 mM  $\text{NaD}_2\text{PO}_4$ ; pD 7.6):  $\delta$  9.71 (t,  $J$  = 1.9 Hz, 2H), 2.59 – 2.54 (m, 4H), 1.69 – 1.61 (m, 4H), 1.44 – 1.35 (m, 2H)

### 7,7-di(hydroxy-*d*)heptanal (14')

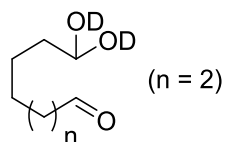

$^1\text{H}$  NMR (500 MHz, 20 mM  $\text{NaD}_2\text{PO}_4$ ; pD 7.6):  $\delta$  9.71 (t,  $J$  = 1.9 Hz, 1H), 5.05 (t,  $J$  = 5.6 Hz, 1H), 2.59 – 2.54 (m, 2H), 1.69 – 1.61 (m, 4H), 1.44 – 1.35 (m, 4H)

### Heptane-1,1,7,7-tetraol-*d*<sub>4</sub> (14'')

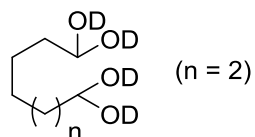

$^1\text{H}$  NMR (500 MHz, 20 mM  $\text{NaD}_2\text{PO}_4$ ; pD 7.6):  $\delta$  5.05 (t,  $J$  = 5.6 Hz, 2H), 1.69 – 1.61 (m, 4H), 1.44 – 1.35 (m, 6H)

### 2-(Hydroxy-*d*)cyclohexane-1-carbaldehyde (15)

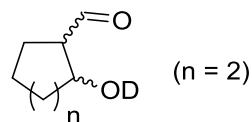

$^1\text{H}$  NMR (500 MHz, 20 mM  $\text{NaD}_2\text{PO}_4$ ; pD 7.6): (major diastereomer)  $\delta$  9.67 (s, 1H), 3.95 – 3.89 (m, 1H), 2.06 – 1.13 (m, 8H), signal of 1 proton overlaps with water signal at 4.80 ppm; characteristic signal of minor diastereomer:  $\delta$  9.72 (s, 1H)

**(2-(hydroxy-*d*)cyclohexyl)methanediol-*d*<sub>2</sub> (15')**

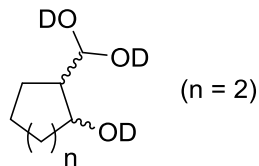

<sup>1</sup>H NMR (500 MHz, 20 mM NaD<sub>2</sub>PO<sub>4</sub>; pD 7.6): (major diastereomer)  $\delta$  5.22 (s, 1H), 4.52 – 4.48 (m, 1H), 3.63 – 3.57 (m, 1H), 2.06 – 1.13 (m, 8H); minor diastereomer was not observed.

**Cyclohex-1-ene-1-carbaldehyde (16)**

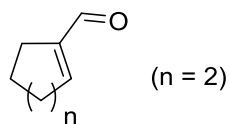

<sup>1</sup>H NMR (500 MHz, 20 mM NaD<sub>2</sub>PO<sub>4</sub>; pD 7.6):  $\delta$  9.29 (s, 1H), 7.13 (s, 1H), 2.46 – 2.33 (m, 2H), 2.21 – 2.09 (m, 2H), 1.72 – 1.61 (m, 4H)

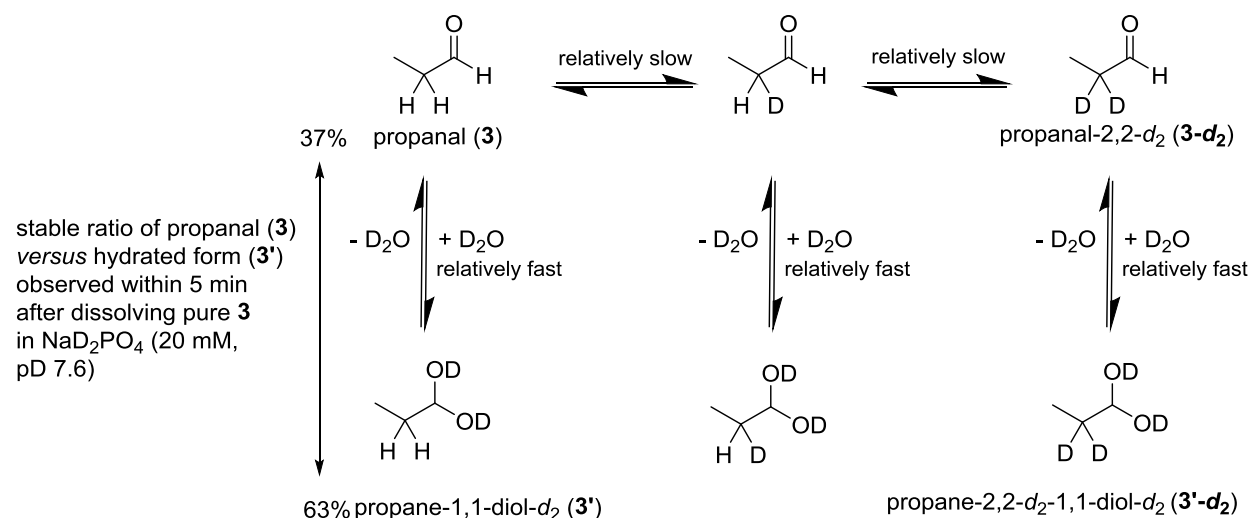

**Scheme S2.** Stable equilibrium between the hydrated (63%) and unhydrated (37%) form of **3** witnessed immediately after preparing the sample ( $\leq 5$  min,  $^1H$  NMR spectroscopy) in the absence as well as presence of enzyme (4-OT WT, F50A, P1A). Hydrogen-deuterium exchange of the acidic protons of substrate **3** (monitored by  $^1H$  NMR spectroscopy. See paragraph ' $^1H$  NMR spectroscopic assay for self-condensation of propanal (3)'). The exchange most likely only takes place at C2 of the unhydrated form of **3** (i.e. propanal) and not at C2 of the hydrated form (3') since protons at C2 of the latter are not acidic. The rates for reaching equilibrium between unhydrated and hydrated form are relatively high compared to the rates of H-D exchange.



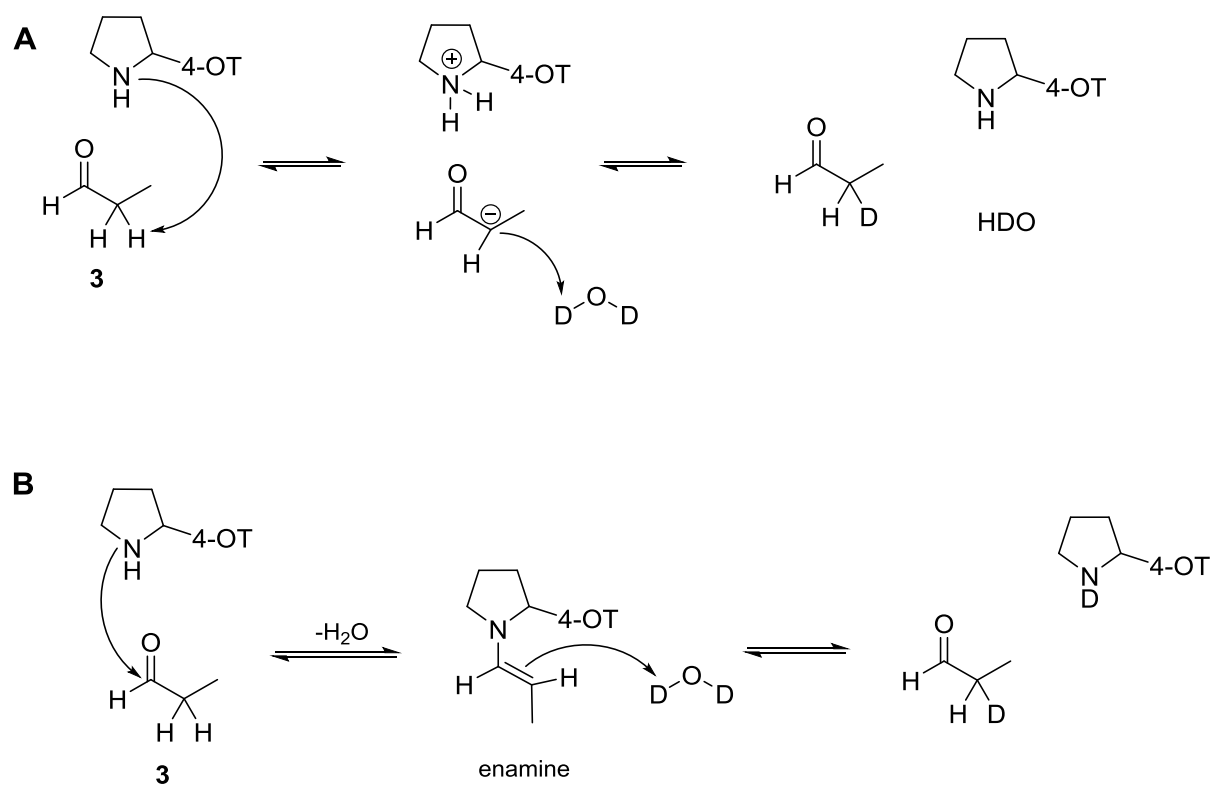

**Scheme S3.** Proposed mechanisms for the 4-OT-catalyzed hydrogen-deuterium exchange within propanal (**3**) and the role of Pro-1 as base (A) or as nucleophile (B).

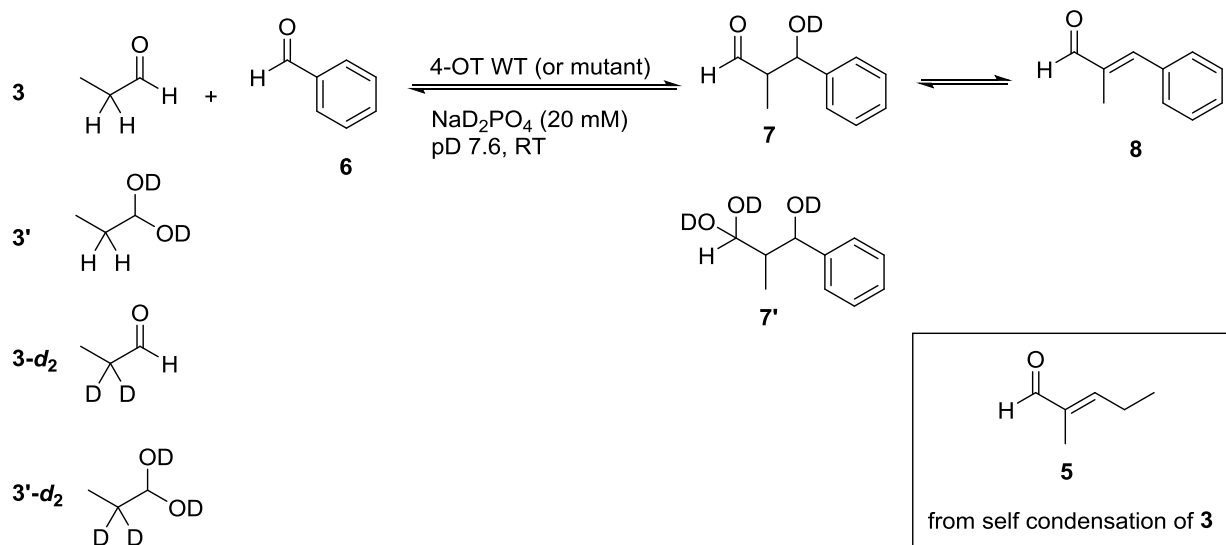

**Scheme S4.** Incubation of **3** and **6** in 20 mM NaD<sub>2</sub>PO<sub>4</sub> buffer (pD 7.6) with 4-OT WT, 4-OT F50A, or 4-OT P1A.

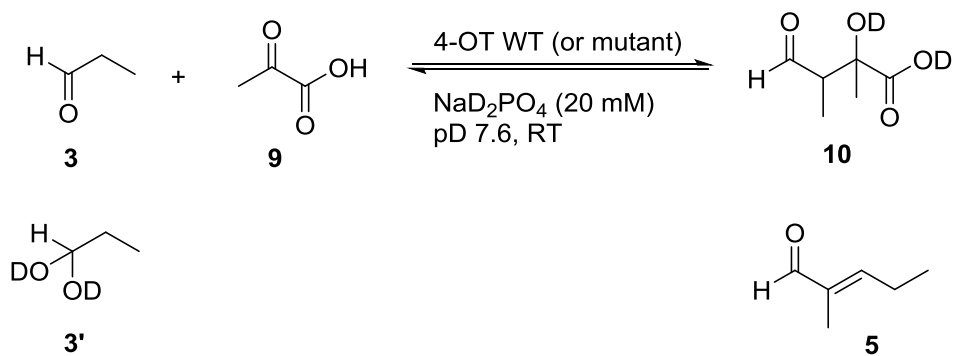

**Scheme S5.** Incubation of **3** and **9** in 20 mM NaD<sub>2</sub>PO<sub>4</sub> buffer (pD 7.6) with 4-OT WT, 4-OT F50A, 4-OT P1A, or synthetic 4-OT. Product **10** is not formed in the absence of enzyme.

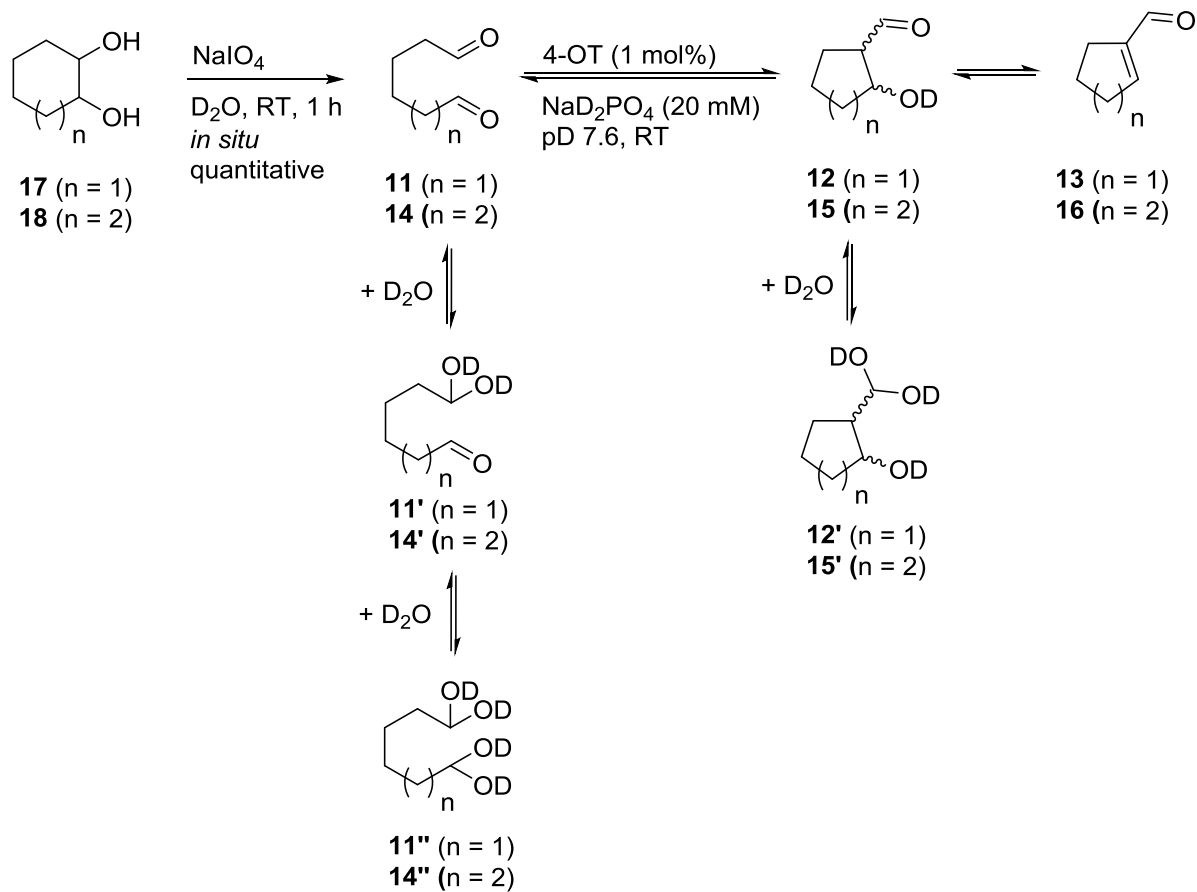

**Scheme S6.** *In situ* preparation of hexanedial (**11**) and heptanedial (**14**), and their mono- and dihydrates (**11'**, **11''**, **14'**, and **14''**), subsequent 4-OT-catalyzed cyclization into products **12** and **15**, and final dehydration into  $\alpha,\beta$ -unsaturated adducts **13** and **16**. Hydrated forms of **13** and **16** were not observed.

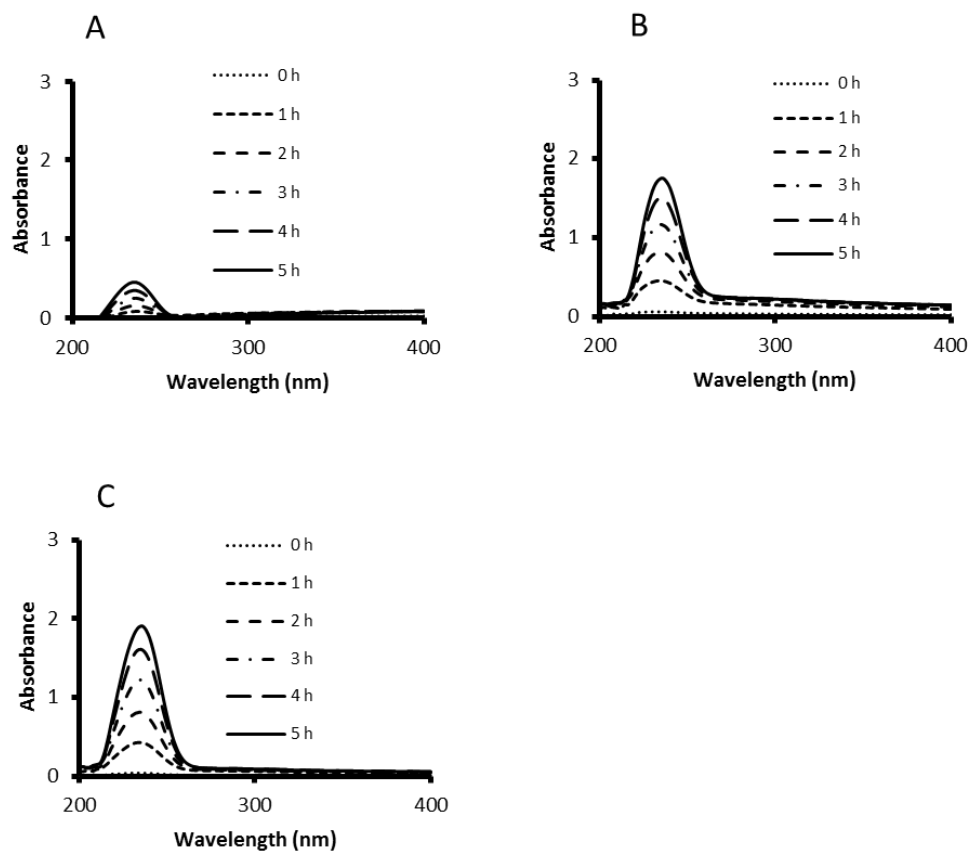

**Figure S1.** UV spectra showing the conversion of 3-hydroxy-2-methylpentanal (**4**) into 2-methyl-2-pentenal (**5**,  $\lambda_{\text{max}} = 234 \text{ nm}$ ). Aldol compound **4** (20 mM in 20 mM  $\text{NaH}_2\text{PO}_4$  buffer (pH 7.3) was incubated with A) no enzyme (control sample), B) WT 4-OT, or C) 4-OT F50A mutant.

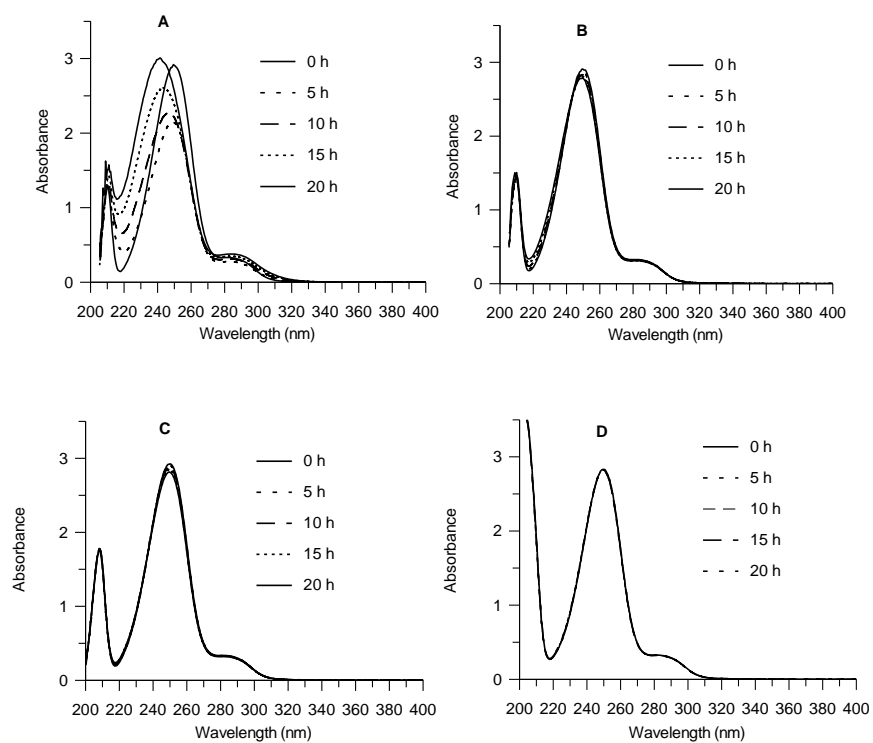

**Figure S2.** UV spectra recorded after incubation of **3** (50 mM) and **6** (2 mM) in 20 mM NaH<sub>2</sub>PO<sub>4</sub> buffer at pH 7.3 with A) 4-OT F50A mutant, B) WT 4-OT, C) 4-OT P1A mutant, or D) no enzyme (control sample).

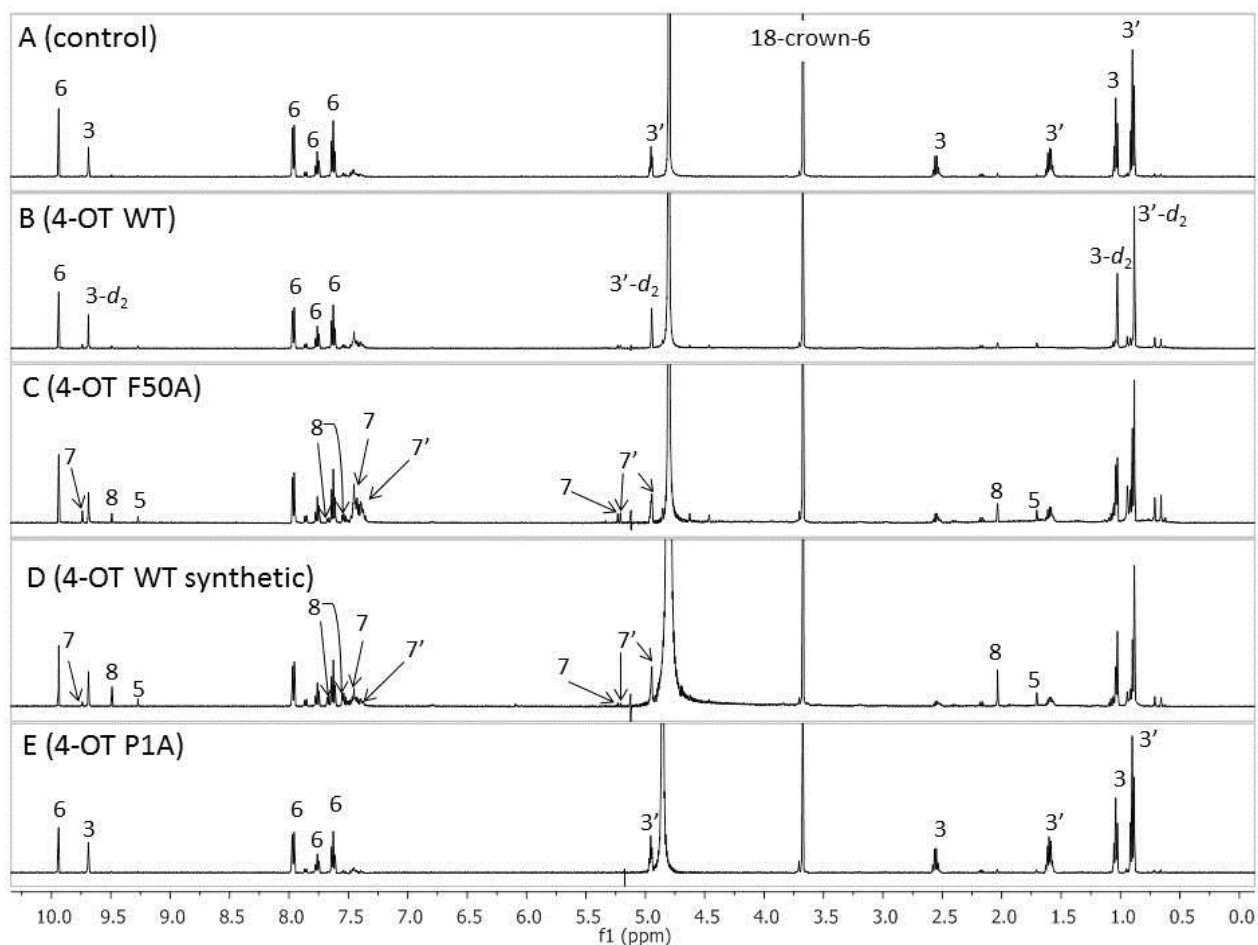

**Figure S3.** Stack plot of <sup>1</sup>H NMR spectra recorded after 4 d of incubation of **3** and **6** in 20 mM NaD<sub>2</sub>PO<sub>4</sub> buffer (pD 7.6) with A) no enzyme; B) 4-OT WT; C) 4-OT F50A; D) 4-OT WT synthetic; E) 4-OT P1A (See Scheme S4 for reaction scheme). Spectrum A shows equilibrium was reached between unhydrated and hydrated (**3'**) forms of **3** and shows no formation of products **7**, **7'**, **8** nor **5** (as a result of self-condensation of **3**). Spectrum B shows that protons at C2 of **3** and **3'** have exchanged with deuterium resulting in formation of **3-d<sub>2</sub>** and **3'-d<sub>2</sub>** (see Scheme S2 for mechanism). Spectrum B furthermore shows little formation of products **7**, **7'**, **8** and **5** (indicative signals are specified in spectrum C). Spectra C and D show formation of products **7**, **7'**, **8** and **5** (only indicative signals are given. Signals of **3** and **6** not marked for the sake of clarity). Hydrated **8** was not observed. Spectrum E shows no formation of products **7**, **7'**, **8** and **5**, nor proton-deuterium exchange of **3**.

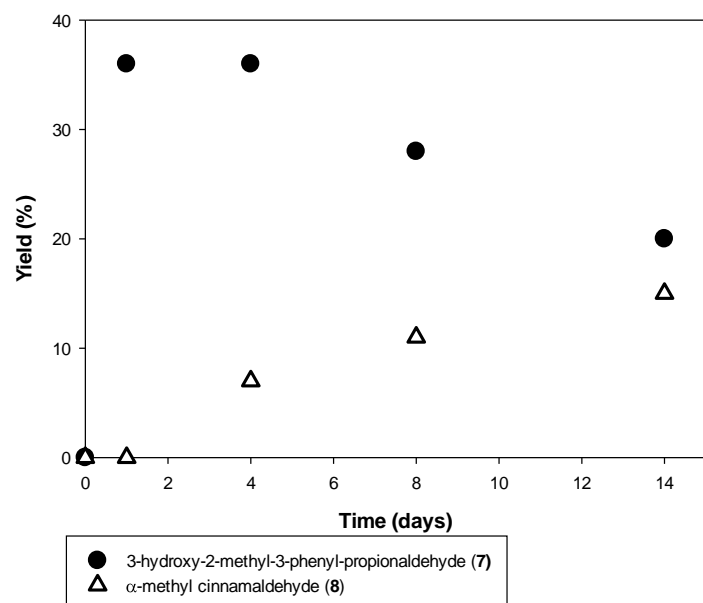

**Figure S4.** Yields (%) of **7** (●) and **8** (△) (based on **6**) in course of time in the reaction mixture (**3** + **6**) incubated with 4-OT F50A.

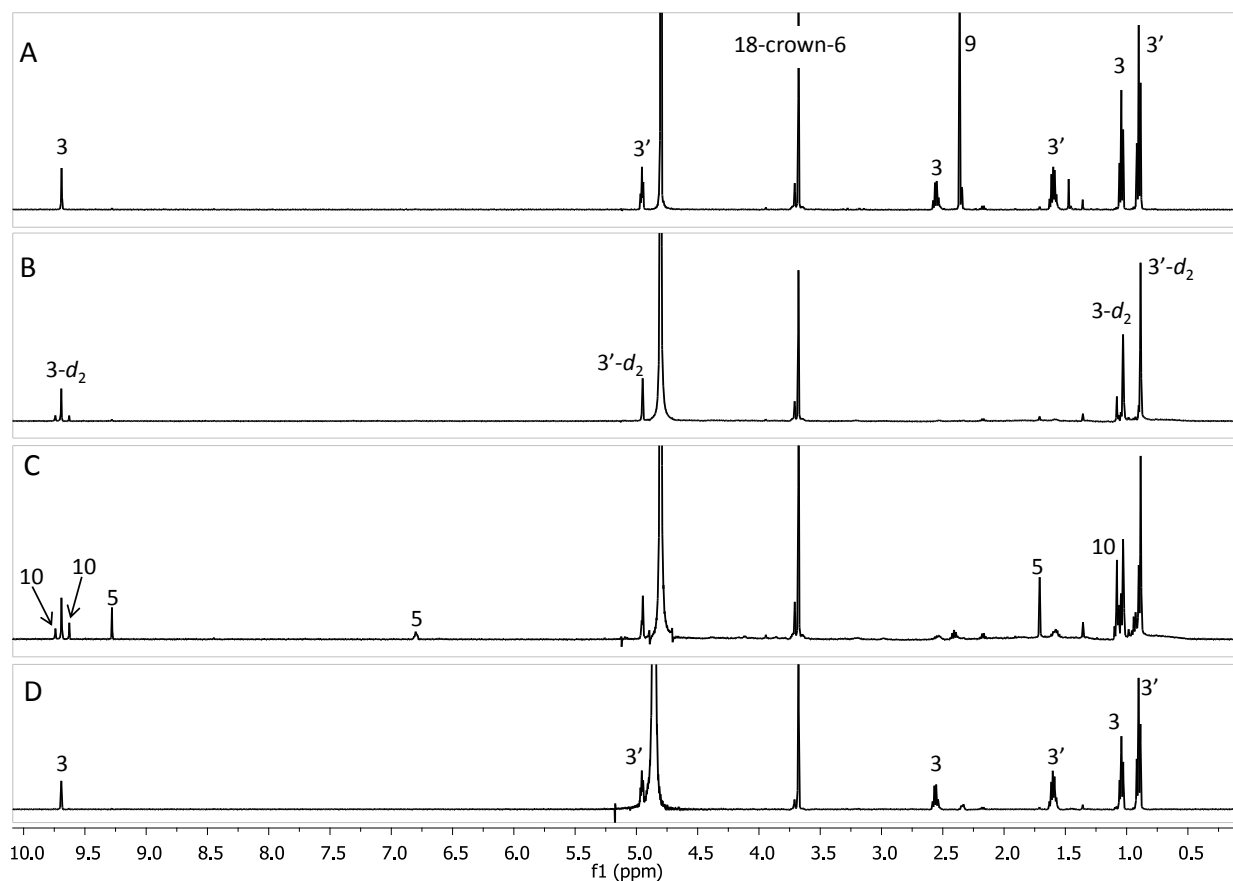

**Figure S5.** Stack plot of  $^1\text{H}$  NMR spectra recorded after 4 d of incubation of **3** and **9** in 20 mM  $\text{NaD}_2\text{PO}_4$  buffer (pD 7.6) with A) no enzyme; B) 4-OT WT; C) 4-OT F50A; D) 4-OT P1A (see Scheme S5 for reaction scheme). Spectrum A shows equilibrium was reached between unhydrated and hydrated (i.e. **3'**) forms of **3** and shows no formation of product **10** nor **5** (as a result of self-condensation of **3**). Spectrum B shows that protons at C2 of **3** and **3'** and methyl protons of **9** have exchanged with deuterium resulting in formation of **3-d<sub>2</sub>**, **3'-d<sub>2</sub>** (see Scheme S2 for mechanism), and **9-d<sub>3</sub>** (latter not visible in spectrum). Spectrum B furthermore shows little formation of product **10** (two diastereomers) and of **5** (indicative signals are specified in spectrum C). Spectrum C shows formation of **10** (two diastereomers) and **5** (only indicative signals are given. Signals of **3** are not marked for the sake of clarity). Spectrum D shows no formation of products **10** and **5**, nor proton-deuterium exchange of **3**. It does however indicate complete H-D exchange of acidic methyl protons of **9**.



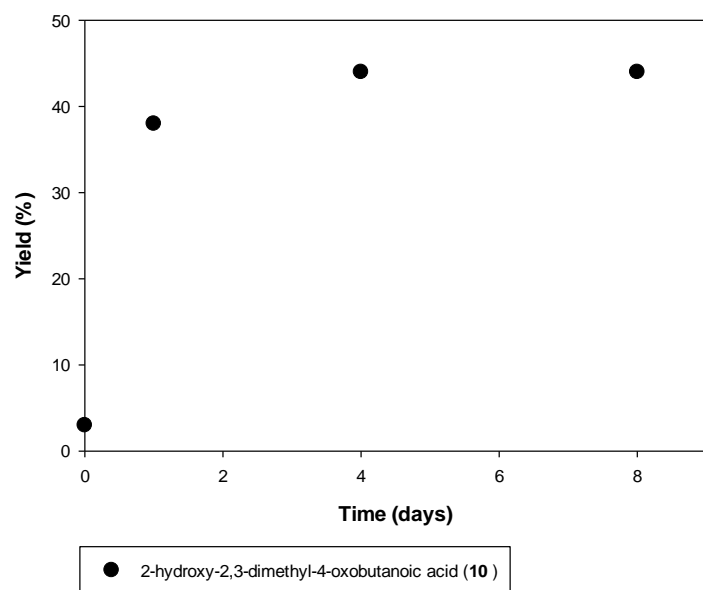

**Figure S6.** Yields (%) of **10** (based on **9**) in course of time in the reaction mixture (**3** + **9**) incubated with the 4-OT F50A mutant.

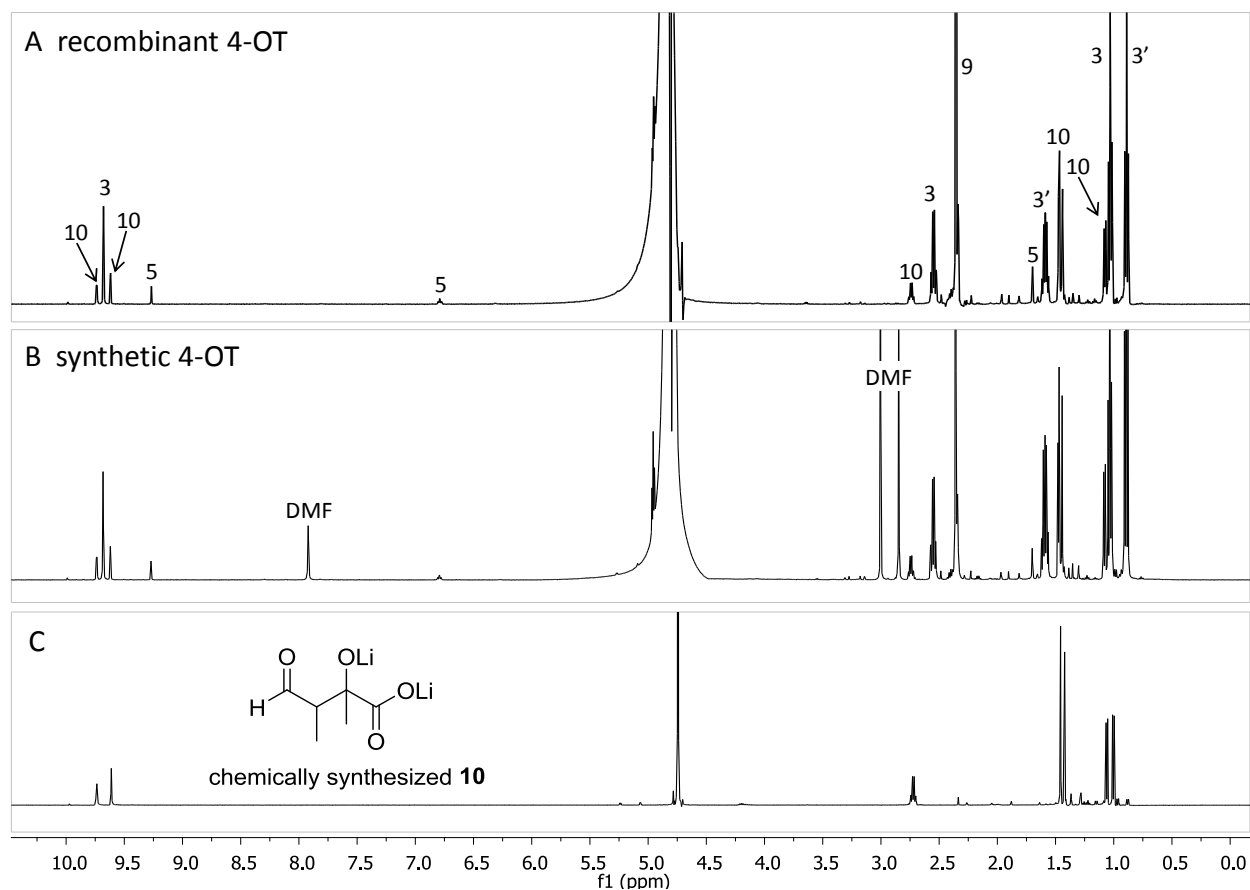

**Figure S7.** Stack plot of <sup>1</sup>H NMR spectra recorded after 4 d of incubation of **3** and **9** in 20 mM NaH<sub>2</sub>PO<sub>4</sub> buffer (pH 7.3) with A) recombinant 4-OT WT and B) synthetic 4-OT WT (DMF used as internal standard). Spectrum C) shows the signals for chemically synthesized **10**. See Scheme S5 for reaction scheme for enzymatically obtained **10** and Scheme S1 for synthetically obtained **10**.

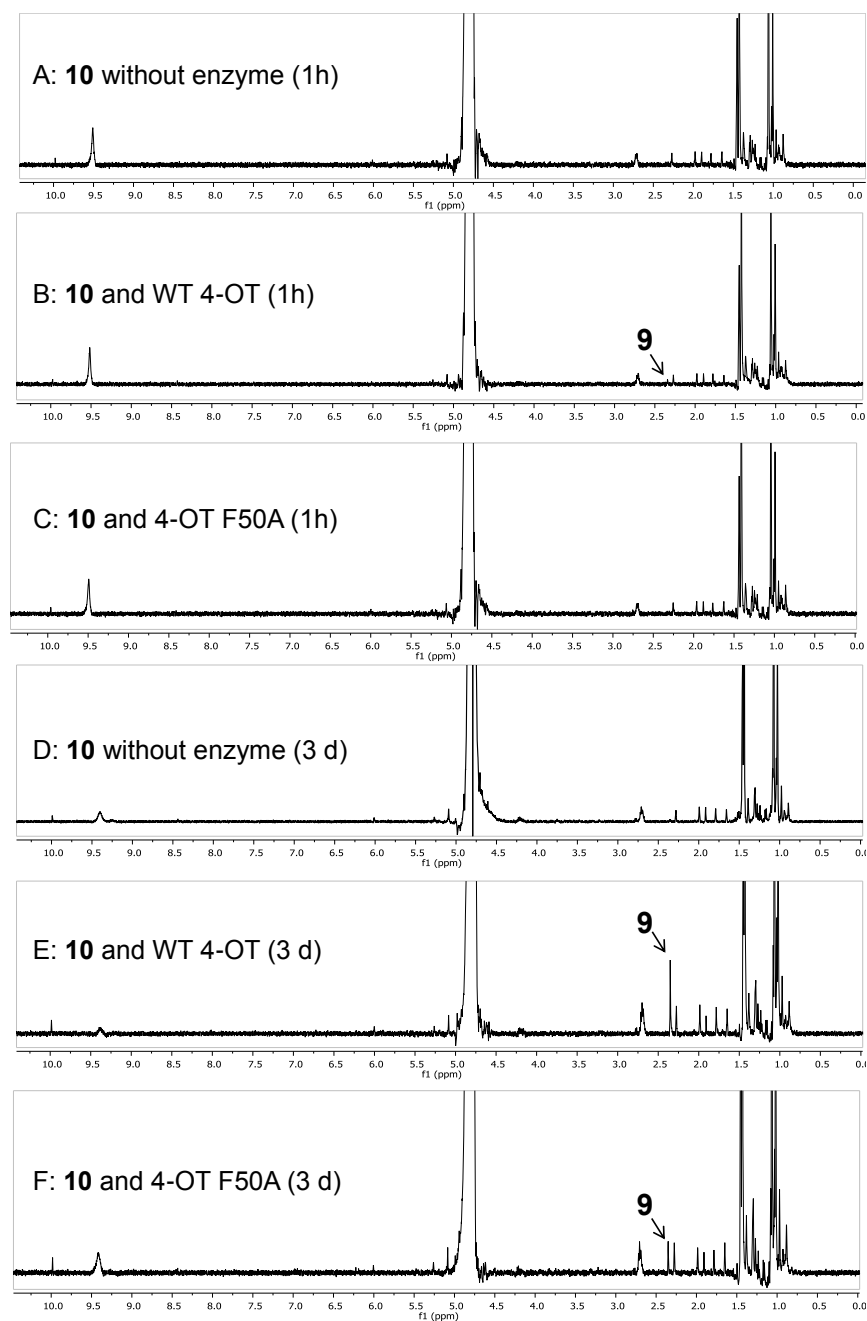

**Figure S8.** Stack plot of  $^1\text{H}$  NMR spectra recorded after the incubation of **10** in 20 mM  $\text{NaH}_2\text{PO}_4$  buffer at pH 7.3 with A) no enzyme for 1 h; B) WT 4-OT for 1 h; C) 4-OT F50A for 1 h; D) no enzyme for 3 d; E) WT 4-OT for 3 d; and F) 4-OT F50A for 3d.

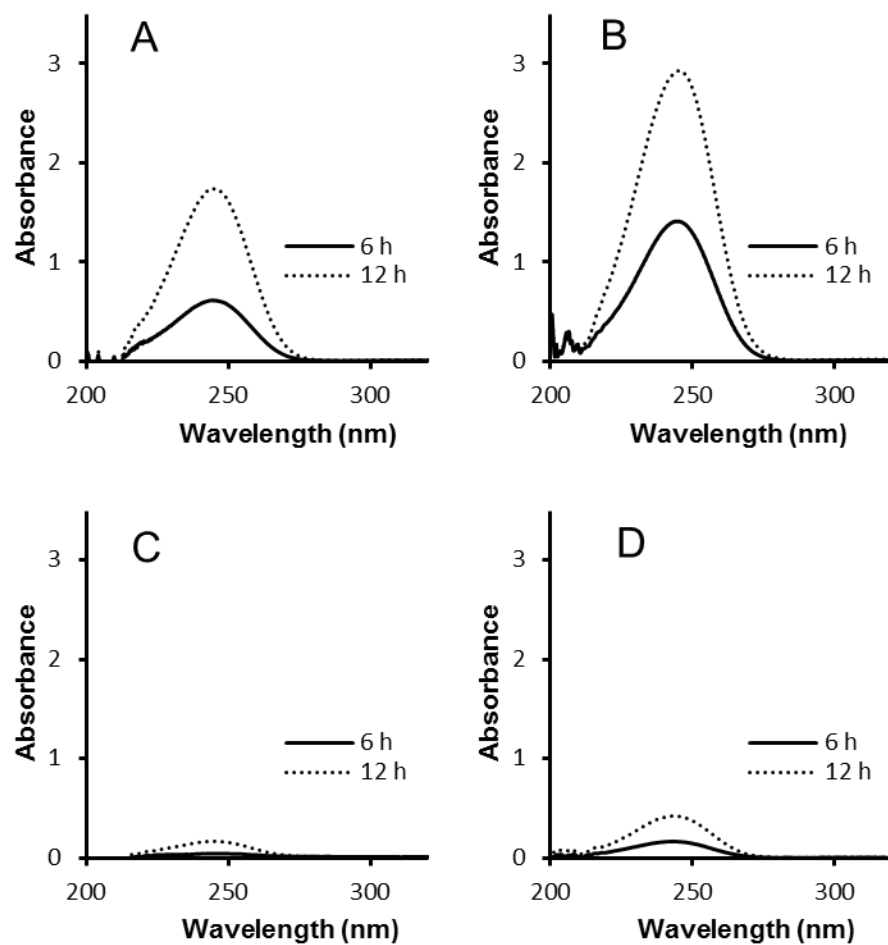

**Figure S9.** UV spectra recorded after incubation of **11** (16.7 mM) in 20 mM  $\text{NaH}_2\text{PO}_4$  buffer at pH 7.3 with A) WT 4-OT, B) 4-OT F50A mutant, C) no enzyme (control sample) and D) 4-OT P1A mutant (t = 6 and 12 h). Increase of absorbance at 245 nm indicates formation of **13**.

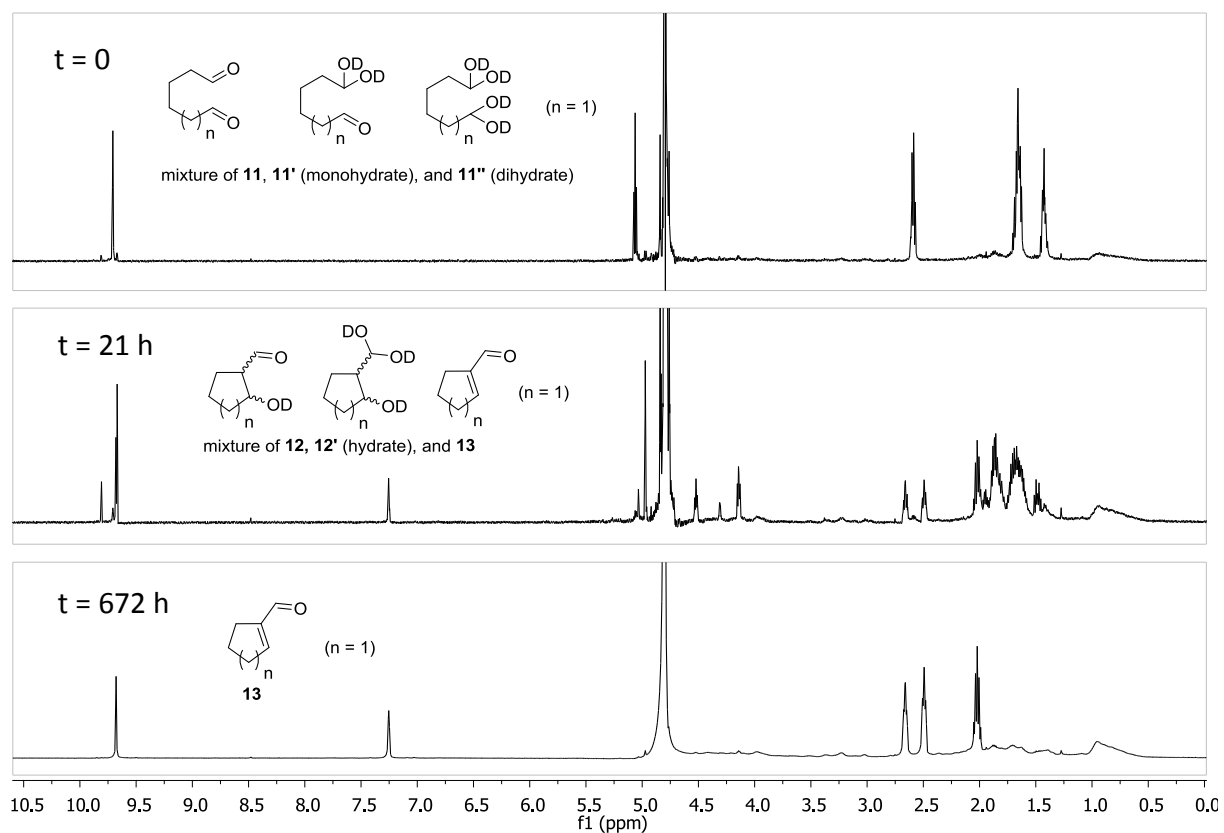

**Figure S10.** Cyclization of hexanedial **11** (15.4 mM) into **12** in  $\text{NaD}_2\text{PO}_4$  (20 mM,  $\text{pD} = 7.6$ ), catalyzed by 4-OT F50A (148  $\mu\text{M}$ ), and subsequent dehydration into **13** monitored by  $^1\text{H}$  NMR spectroscopy ( $t = 0, 21, 672$  h) (See Scheme S6 for reaction scheme). The enzyme 4-OT is responsible for broad absorptions between  $\sim 2$  and  $0.5$  ppm, especially well-visible in the bottom spectrum.

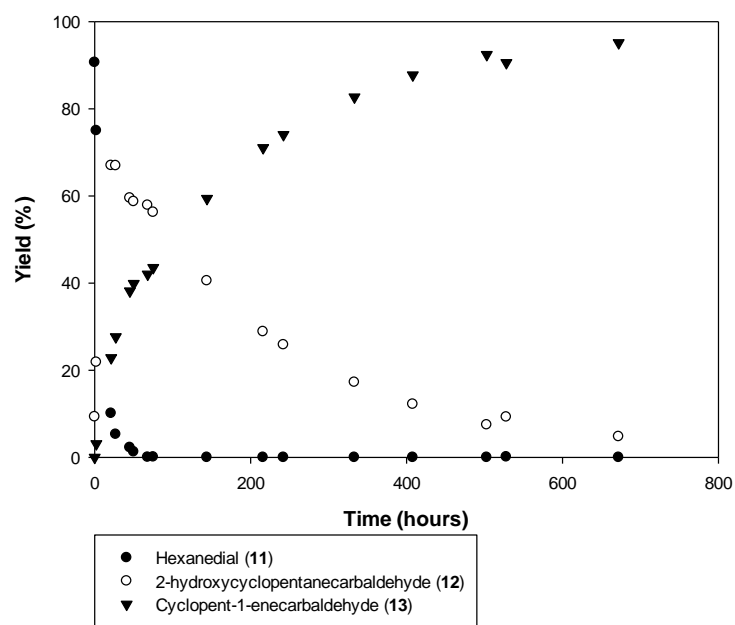

**Figure S11.** Plot of the presence (%) of **11** and yields (%) of **12** and **13** in course of time in the reaction mixture incubated with the 4-OT F50A mutant (in 20 mM NaD<sub>2</sub>PO<sub>4</sub> buffer at pD 7.6).

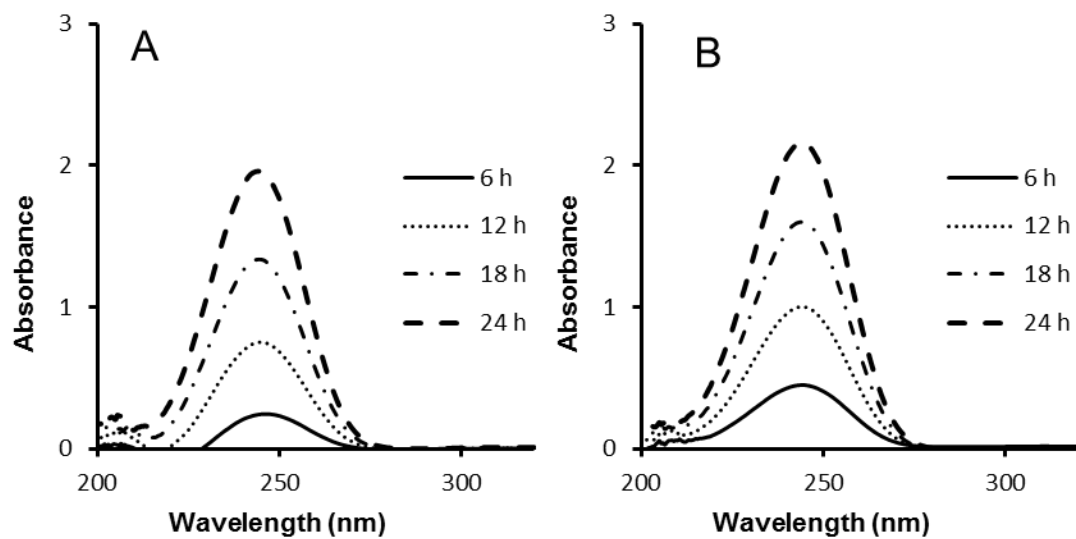

**Figure S12.** UV spectra recorded after incubation of **11** (16.7 mM) in 20 mM NaH<sub>2</sub>PO<sub>4</sub> buffer at pH 7.3 with 0.075 mM A) recombinant WT 4-OT and B) synthetic WT 4-OT (t = 6, 12, 18 and 24 h).

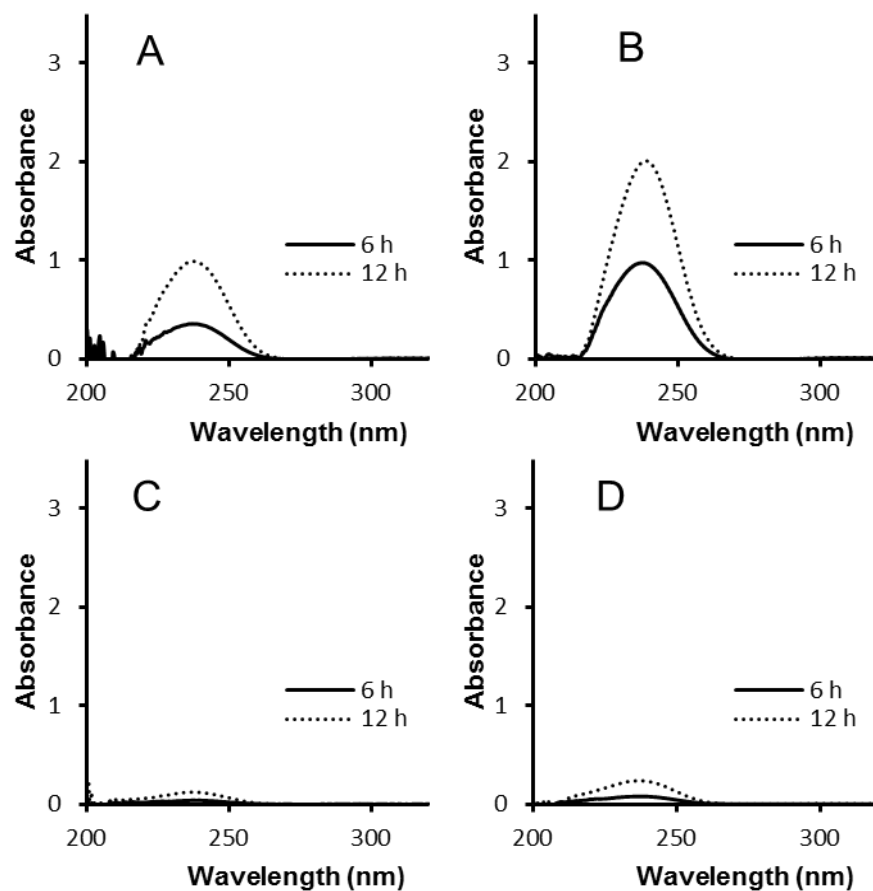

**Figure S13.** UV spectra recorded after incubation of **14** (16.7 mM) in 20 mM  $\text{NaH}_2\text{PO}_4$  buffer at pH 7.3 with A) WT 4-OT, B) 4-OT F50A mutant, C) no enzyme (control sample) and D) 4-OT P1A mutant (t = 6 and 12 h). Increase of absorbance at 236 nm indicates formation of **16**.



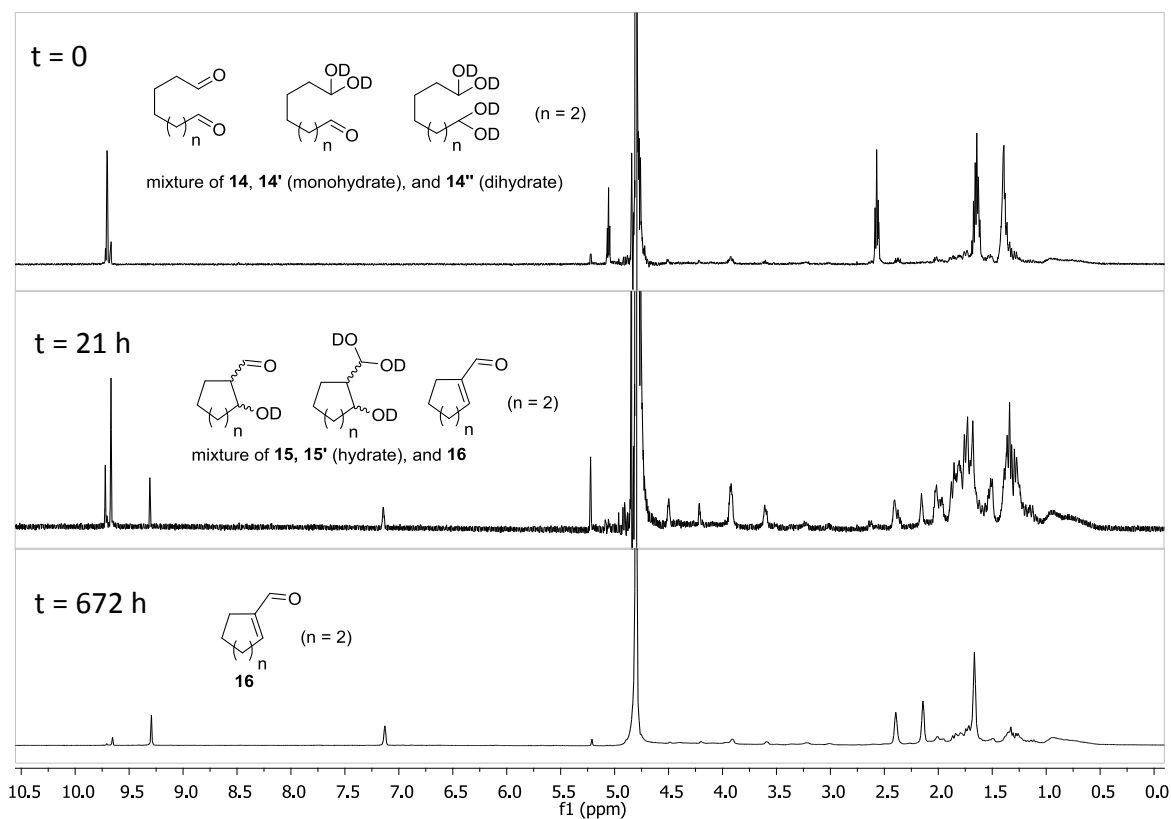

**Figure S14.** Cyclization of heptanedial **14** (15.4 mM) into **15** in NaD<sub>2</sub>PO<sub>4</sub> (20 mM, pD = 7.6), catalyzed by 4-OT F50A (148 μM), and subsequent dehydration into **16** monitored by <sup>1</sup>H NMR spectroscopy (t = 0, 21, 672 h) (See Scheme S6 for reaction scheme). The enzyme 4-OT is responsible for broad absorptions between ~2 and 0.5 ppm, especially well-visible in the bottom spectrum.

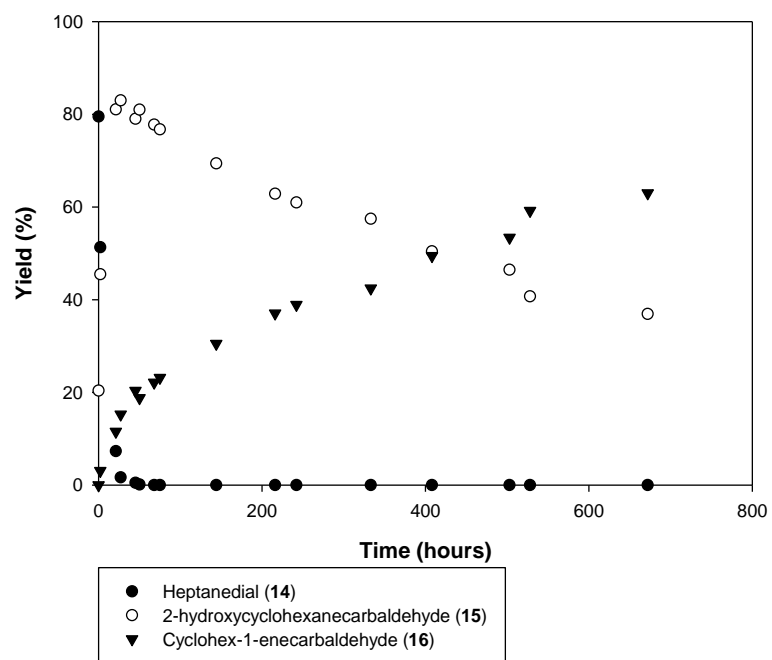

**Figure S15.** Plot of the presence (%) of **14** and yields (%) of **15** and **16** in course of time in the reaction mixture incubated with the 4-OT F50A mutant (in 20 mM NaD<sub>2</sub>PO<sub>4</sub> buffer at pD 7.6).

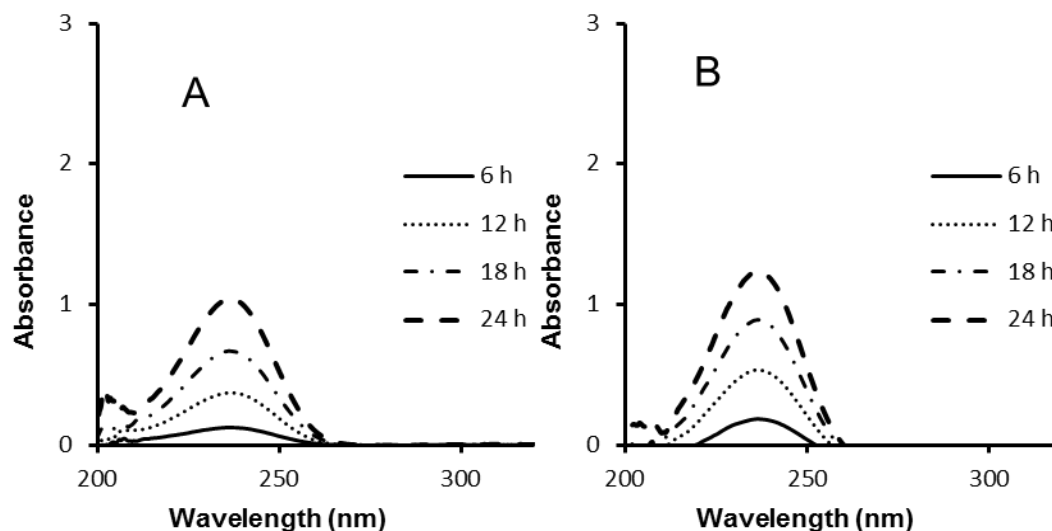

**Figure S16.** UV spectra recorded after incubation of **14** (16.7 mM) in 20 mM NaH<sub>2</sub>PO<sub>4</sub> buffer at pH 7.3 with 0.045 mM A) recombinant WT 4-OT and B) synthetic WT 4-OT (t = 6, 12, 18 and 24 h).

## References

- 1 H. Raj, B. Weiner, V. Puthan Veetil, C. R. Reis, W. J. Quax, D. B. Janssen, B. L. Feringa, G. J. Poelarends, *ChemBioChem* 2009, **10**, 2236.
- 2 M. C. Fitzgerald, I. Chernushevich, K. G. Standing, S. B. H. Kent, C. P. Whitman, *J. Am. Chem. Soc.* 1995, **117**, 11075.
- 3 A. Córdova, *Tetrahedron Lett.* 2004, **45**, 3949.
- 4 S. López, F. Fernandez-Trillo, L. Castedo, C. Saá, *Org. Lett.* 2003, **5**, 3725.
- 5 J. Sambrook, E. F. Fritsch, T. Maniatis, *Molecular Cloning: A Laboratory Manual*, 2nd ed., Cold Spring Harbor Laboratory Press, New York, 1989.
- 6 W. J. Waddell, *J. Lab. Clin. Med.* 1956, **48**, 311.
- 7 E. Zandvoort, B.-J. Baas, W. J. Quax, G. J. Poelarends, *ChemBioChem* 2011, **12**, 602.
- 8 A. Brik, L. J. D'Souza, E. Keinan, F. Grynszpan, P. E. Dawson, *ChemBiochem* 2002, **3**, 845.

- 
- 9 R. Mahrwald, B. Costisella, B. Gündogan, *Tetrahedron Lett.* 1997, **38**, 4543.
- 10 C. H. Heathcock, C. T. Buse, W. A. Kleschick, M. C. Pirrung, J. E. Sohn, J. Lampe, *J. Org. Chem.* 1980, **45**, 1066.
- 11 J. Schreiber, C. G. Wermuth, *Bull. Soc. Chim. Fr.* 1965, **8**, 2242.
- 12 J. Barluenga, F. González-Bobes, M. C. Murguía, S. R. Ananthoju, J. M. González, *Chem. Eur. J.* 2004, **10**, 4206.
- 13  $\lambda_{\text{max},13}$  in 99.5% EtOH = 236 nm: G. Magnusson, S. Thoren, *J. Org. Chem.* 1973, **38**, 1380.
- 14  $\lambda_{\text{max},16}$  in EtOH = 230 nm: A. S. Dreiding, J. A. Hartman, *J. Am. Chem. Soc.* 1953, **75**, 939; See also: A. S. Dreiding, S. N. Nickel, *J. Am. Chem. Soc.* 1954, **76**, 3965.
- 15 M. C. Pirrung, J. Chen, E. G. Rowley, A. T. McPhail, *J. Am. Chem. Soc.* 1993, **115**, 7103.
- 16 M. J. Meyers, G. B. Arhancet, S. L. Hockerman, X. Chen, S. A. Long, M. W. Mahoney, J. R. Rico, D. J. Garland, J. R. Blinn, J. T. Collins, et al., *J. Med. Chem.* 2010, **53**, 5979.
- 17 S. Carlsson, S.-O. Lawesson, *Tetrahedron* 1982, **38**, 413.
